# Supplementary material for: Black-necked spitting cobra (Naja nigricollis) phospholipases A2 may cause Trypanosoma brucei death by blocking endocytosis through the flagellar pocket
Source: PubMed Central journal article supplement (PMC9013370; doi:10.1038/s41598-022-10091-5), 2022-04-16
Supplement: 41598_2022_10091_MOESM1_ESM.pdf [file 41598_2022_10091_MOESM1_ESM.pdf]

**A**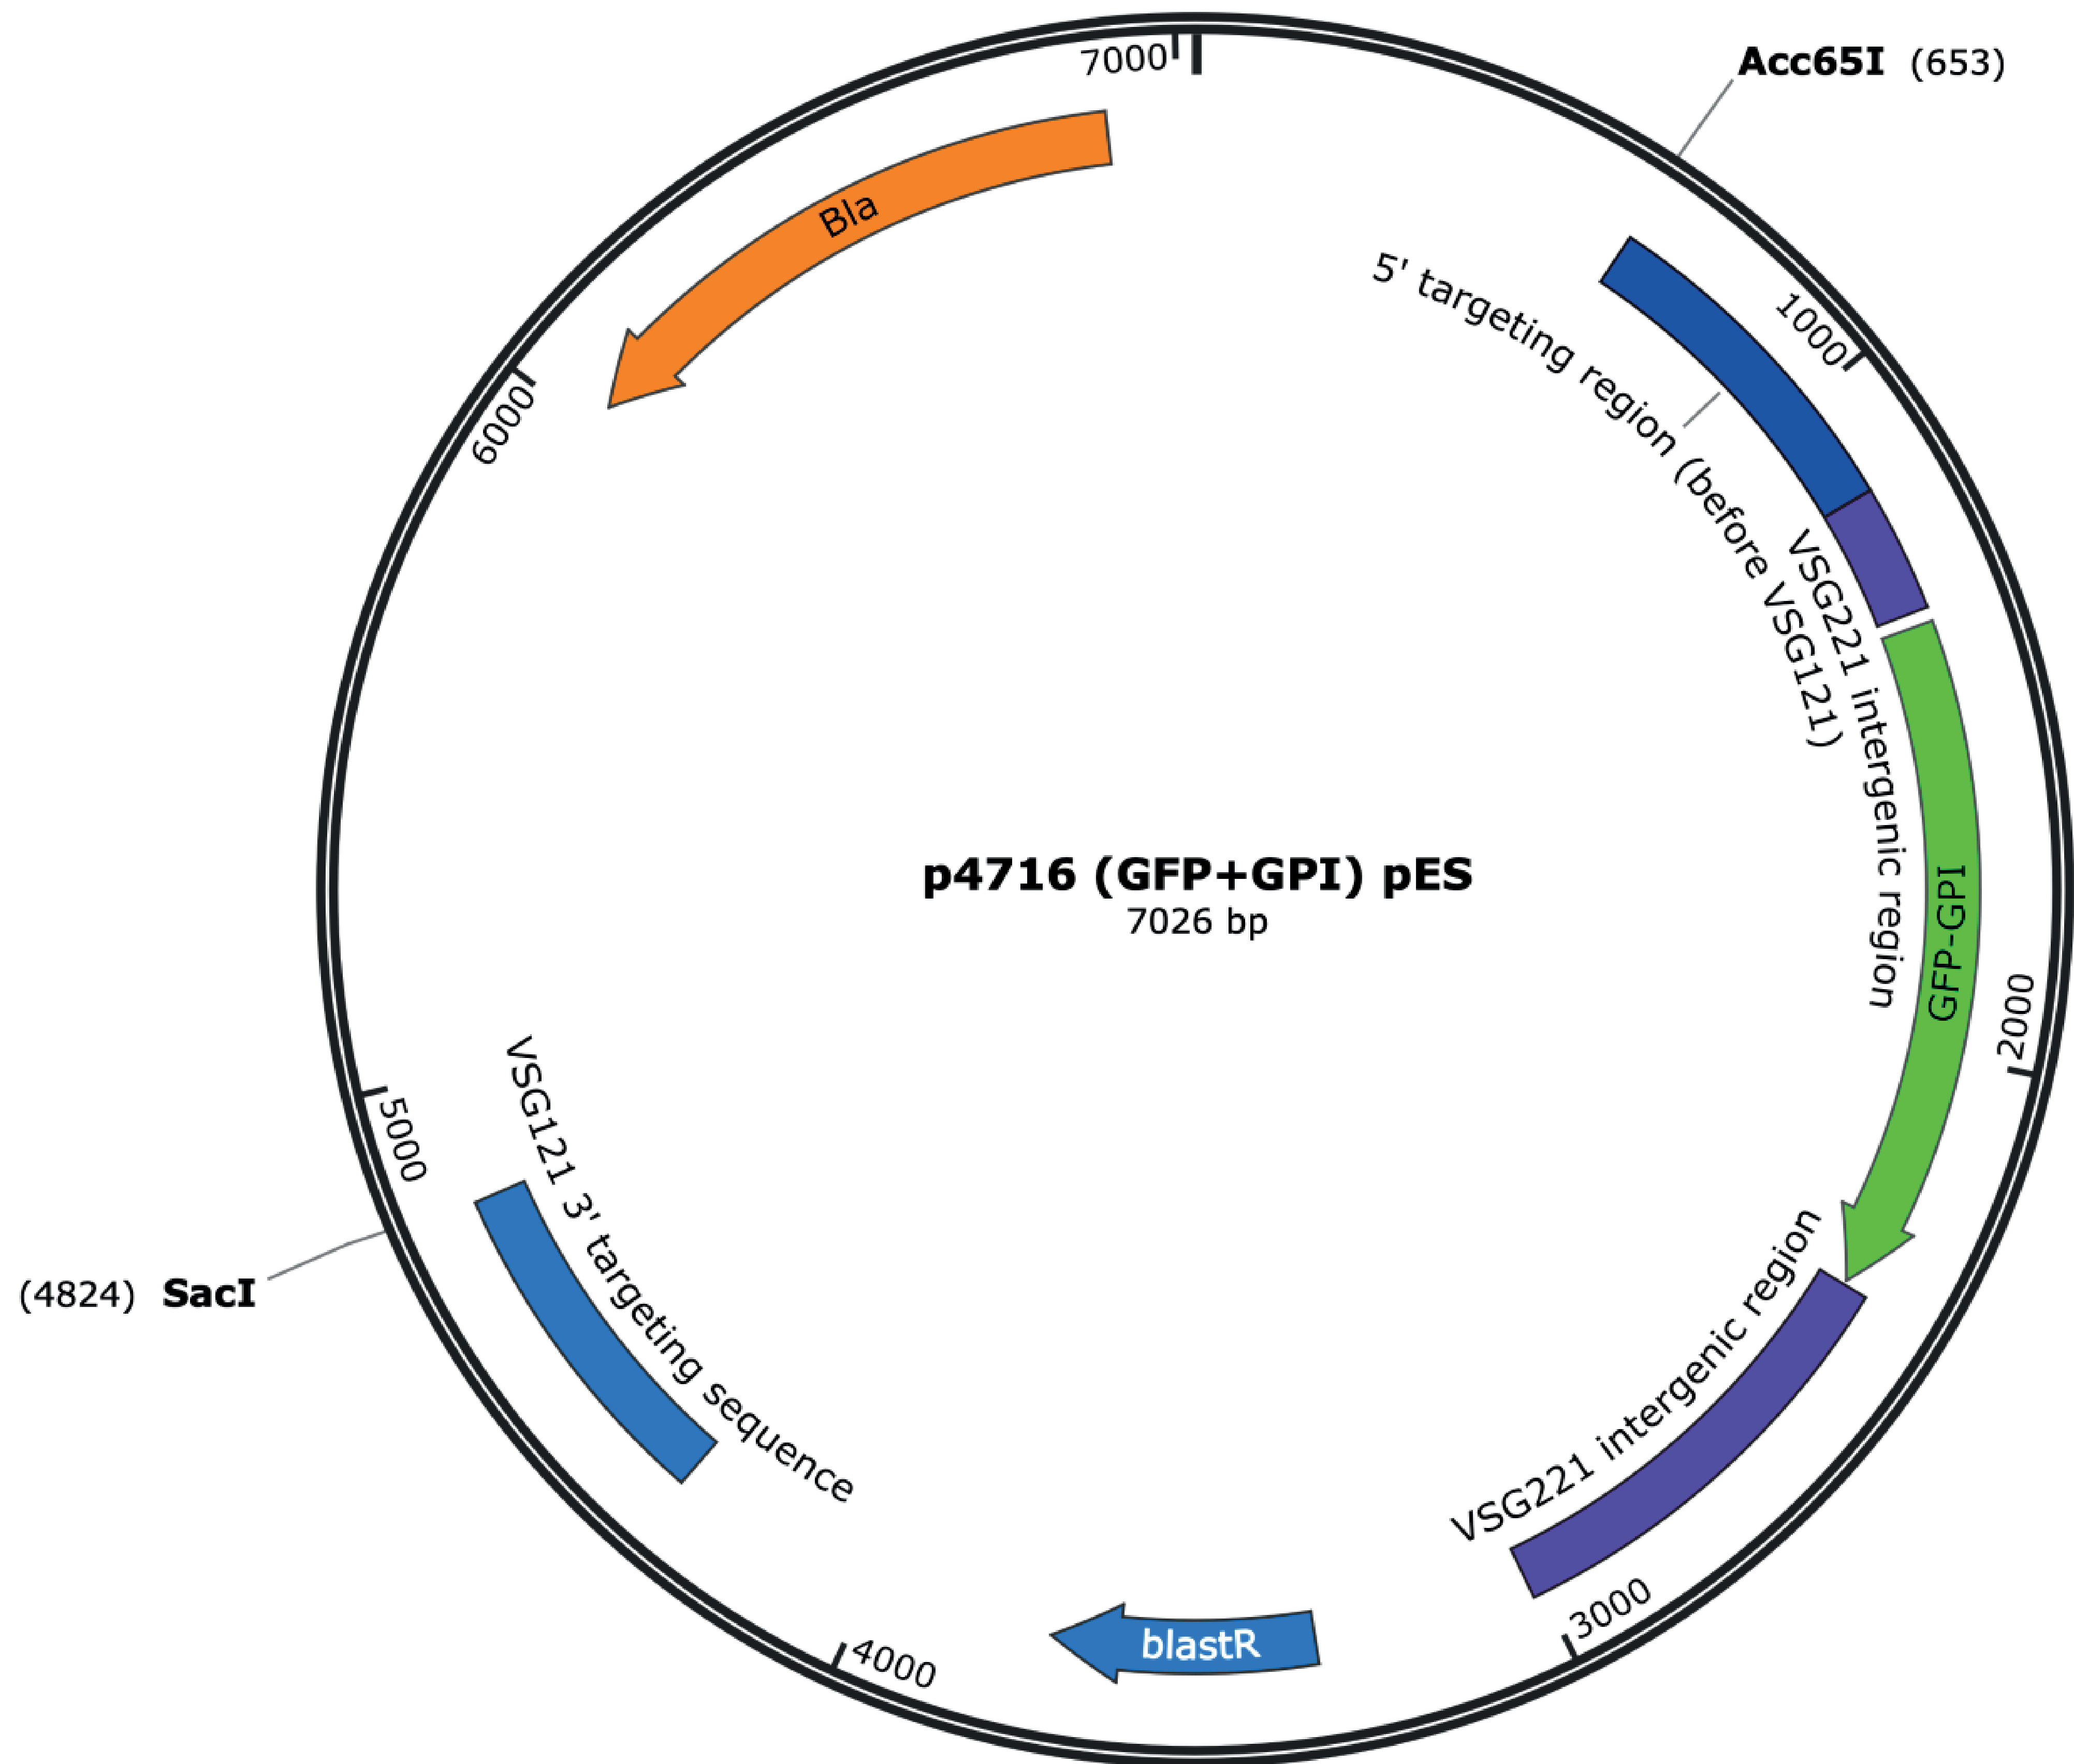**B****Acc65I**

GGTACCCTGTTCTAAACATAAACATAGCAATAAATATTATCGGAAACGAGCAAATACAGGAAGGTTGTAATTGAAATAGAGTCACTAAATTATCCGGTAAACCAGTGGAAAGTAATAGTAAAA  
TTAACAAAAGTATAGAATGAAATAATGTGACTGTCAACAACCTCCGCGAGAACAAGGGAAAATAATACATGAAGAGGAAGAGGAGATAATGCACCGTATTTCACTCAGAAATGGATATATTA  
TTTTGCCGTGGTGGTGGCGTCTATGTTTCGTTGGCTGATGACGGATTCTAATGTTTCAGTTGTTGACAATAAGCAACTCCAAAGCACACAATGGTAAACAAAGGAAATGGAACAAAAGG  
AAAGTGCTTGAAGATTGCAGTCTACAACAAAATACAAAATTGCAGTAAGAAAACACAGAGCAGCTGTGATCACTGCCTTGACTGAGGATATATTTTCGGAATCGAAAACTAATC  
GTTTATAAATTAGAAAAGCACTGACTCGAGCACACAAGCATTCTATACGTAAAAGATCTAGTATATAGGAGCAACGCTCTGCCAAAACATAATGGCAAGACAAACGGCCGTGTTTGCC  
GCTGATGCTACAGAACCAGCTTAATTTCCAGAAGACGAAAATTTGCATGTTTTCCACAAATATTTAATTACTCTTGAAGATTGTAGTTATTTCTACGCGACACGAACGGCCATGCCAA  
GTAACCAGGAGGCACGTCTTTTTCTGCAGTGTCTGTGCTTGCACAGGTGCTTCCAATTTCTGTGGATAGTGCAGCAGAGAAGGGTGCACGTGAGGTGCACACAAACCAGGACCCA  
AGTGGTAGTAACACAACAAGTGGTAGTAGTTCCATGGGTCTGTAAGGGCGAGGAGCTGTTACCGGGGTGGTGCCCATCTGGTCGAGCTGGACGGCGACGTAAACGGCCACAAGT  
TCAGCGTGCCTGGCGAGGGCGAGGGCGATGCCACCAACGGCAAGCTGACCCTGAAGTTCATCTGCACCACCGGCAAGCTGCCCGTGGCCCTGGCCACCCTCGTGACCACCCTG  
ACCTACGGCGTGCAGTGTTCGACGCTACCCCGACCACATGAAGCAGCAGACTTCTTCAAGTCCGCCATGCCCGAAGGCTACGTCCAGGAGCGCACCATCAGTTTCAAGGACG  
ACGGCACATAAAGACCCCGCGCCGAGGTGAAGTTCGAGGGCGACACCCTGGTGAACCGCATCGAGCTGAAGGGCATCGACTTCAAGGAGGACGGCAACATCTGGGGCACAAGC  
TGGAGTACAACCTTAAACAGCCACAACGTCTATATCACAGCCGACAAGCAGAAGAACGGCATCAAGGCAAACCTTCAAGATCCGCCACAACGTGGAGGACGGCAGCGTGCAGCTCGCC  
GACCACTACCAGCAGAACACCCCATCGGCGACGGCCCGGTGCTGCTGCCGACAACCACTACCTGAGCACCCAGTCCGTGCTGAGCAAAGACCCCAACGAGAAGCGCGATCAC  
ATGGTCCTGCTGGAGTTCGTGACCGCCCGGGGATCACTCACGGCATGGACGAGCTGTACAAGGGCGCCAAGAAGGTGGCAGATGAGACAGCAAAGGATGGTAAGACAGGTAAAC  
ACAAACACAACAGGTAGTAGTAACAGTTTTGTGATTAGTAAGACACCCTTTGGCTTGCAGTGTCTTTTTTAATTAATTTCCCCCTCAAATTTCCCCCTCCTTTTTAAATTTTCTTT  
GCTACTTGAACCTTTTTGATATATTTAACACAAAACCAGCCGAGATTTTGTGTTCTGTGTTTTGTAAGTTGACTGTCTGATTGTCTAGAAATATTTCTGGCAACTAAAATTTTTTCT  
TTTTCTGTTTTTTTTGTAGGTAGGTAGGAATGGGGGGGGGGTAGTTAGGTAGGTTAGTTAGGTTAGTTAGGGGGTTAGTTAGGGGGTTAGGCTTAGGATTAGGATTAGACTTAG  
GCTTAGGATTAGGATTAGGATTAGGATTAGGTTAATTTTTCTCTTTTTTTAACTCACACCTCTATCCTGGATTTTTAATTTTTTTTTTAGCCATTCGCGGCTCCTTTTTTTTTTTT  
GCGCAATGTTAATTTTTTATTGTGTTTTCAATTTTTTGTCAACCATGCAGCGGCTGTTTTGTTATGGCGACCTAACCCCTCCTCCCCCCCCCGCCGCGCACCTCCATTTTTAA  
AAATTTTTTACCAGCTCCTTCAACCAGAATTTTTTAAATTTTTTAAATTTTTTATTTTTCCGTGGTTTTGAATCTTAATTTTTCGGGGGAATTCCTGCAGCCCGGGTAGAAAGTGTGACA  
ACGTGCGACCATGTGTAGGTTTTCAATTTATGTTCTTTCTTTTTTTTTGTGAATTTGTTTTCTGTCTCAAATGTTTTAATTCGCTTGGGACCTATGTTTTTCTGTTTTTTGCTCACC  
CTTTGTGATAGGAGGCACCCTGTCACGTCTGTGGTTCGCTGTATGCCTTCTCCCTTATTCGCTTCTTCTGCTGTGTCACACCTCTTTCTCTCTCCCTTTCGGCCTTTCTTTCA  
ATCTTGTCTTCTCGACCAAGCCCTACTAGAGGAGAAAGAAGTAAACCTTTTCAAGAAAATAGTTCAAACGAATTCATATGCCTTTGTCTCAAGAAGAATCCACCCTCATTGAAAGA  
GCAACGGCTACAATCAACAGCATCCCCATCTGAAGACTACAGCGTCGCCAGCGCAGCTCTCTAGCGACGGCCGATCTTCACTGGTGTCAATGTATATCATTACTGGGGGAC  
CTTGTGCAGAACTCGTGGTGTGCTGGCACTGCTGCTGCGGCAGCTGGCAACCTGACTTGTATCGTCGCGATCGGAAATGAGAACAGGGGCATCTTGAGCCCTGCGGACGGTG  
CCGACAGGTGCTTCTCGATCTGCATCTGGGATCAAGGCCATAGTGAAGGACAGTATGGACAGCCGACGGCAGTTGGGATTCTGTAATTGCTGCCCTCTGGTTATGTGTTGGGAGG  
GCTAATTCGAATAGACGCGGACGGGGCATTCCCGTTTCGTCATTAGCAGTAGGTAATGAAGATGTTTGTCTCGTCCCTTCTCCTTCGTCCTTCTGTCATTTTGTCTTTTTGTGTTT  
ATGTTTTGTTGTTGTTTTCTTAATTTTTTTTTTCTCCACGTTTGTGATACATCCGCGCGCCACTTATTAGAGAGCCACGGATAGTAGAGGAGGTGGGAAGGGTATATGAGGGACAC  
GCGTACCATGATGTGGGATGATTGGGGTCCCTGTCTGTCTTACGTGACTATGTATGAACCGTCACGTGTAAGATGAGCTAGTGAGATCAACAGTACAACCTCATCAACACGCCCTTCT  
CTCGTTAAATGTACACAATCTTGATCCTCCACCTTTATGGGTCCCATTTGTTGCTCTTCCGCTGTGTGGAGTGCCTACACGCACTTCTCACTTCGTAAGTGGTGGTGGCGTAAGTA  
TTGCCAATGTTGACTCTATATTCTCCTCCTCACCCCTCGCGGTGCTGATTTCTGACAGATCTTCAAACACTAGATTAAGCAAAGGACTATTCATCCGTTACTAGTACCACCTGTGC  
GACGAAGCTGCAAAAAGAATAAAGCGGCACCAAGTAGTTCTAACAAGCTGTAGTGAGACCCAGCTGCACGATAGATTAATTTATTTTAAATTTTGAATTTTTAAATTTATATAAGT  
GTAATTCACCACATTAAGGGGGAAAGAGGACTCAAATGATATTCTAATTAGCTGAAGGAAACGGTGTGAAAATAGATAATAAACATTCCCCAAAATATTACCACAACCTAATCTCT  
TTGTTTTCTCTTTCATGTTGCTAAACTAGACAACAGCGTTAAGCGATGGCCGTGCACAGAGCCCTAGCGGGTACGCGATTAGTCTTTACGTTTTACTACCCAGAAAATCGGGAGCA  
ACAGACAAAGGCGCGATCAAGTTTGAAGACGTGGGAGCCGCTCTGTTACTGACACAAGACTTCGGTAACCTTTACAACAGAGCGCACAAACTTAATCTCGACATCGACACCTACGTA  
ACCGCAGCCACCGCGGTGGAGCTC

**SacI**

Supplementary Figure 1. A. p4716 (GFP-GPI) pES plasmid map. B. Acc65I/SacI insert used for transfection.
